# Supplementary material for: Immunomodulatory Activity In Vitro and In Vivo of a Sulfated Polysaccharide with Novel Structure from the Green Alga Ulva conglobata Kjellman
Source: MDPI journal article supplement (doi:10.3390/md20070447), 2022-07-08
Supplement: s1 [file s1]

# SUPPLEMENTARY FIGURES

**A**

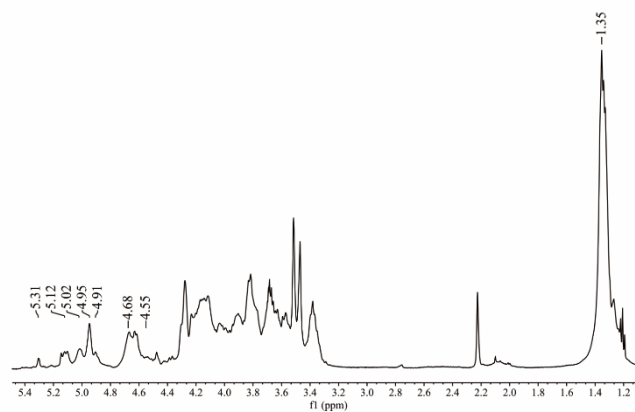

**B**

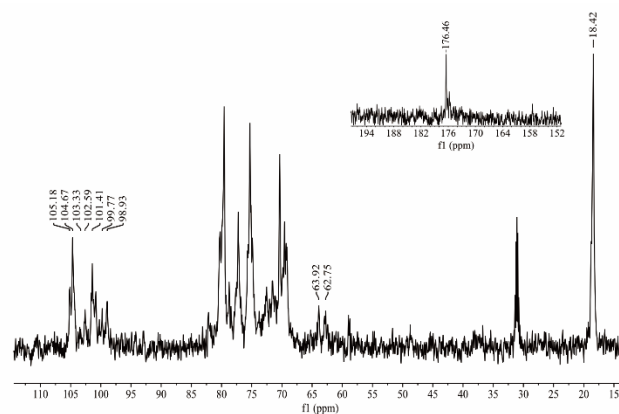

**C**

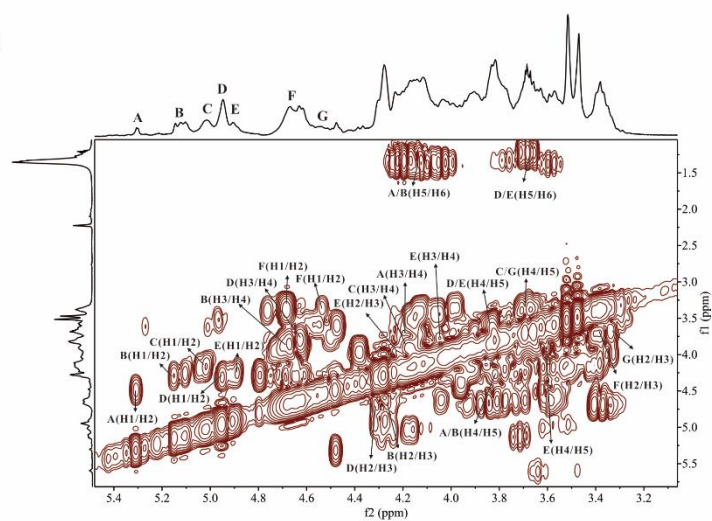

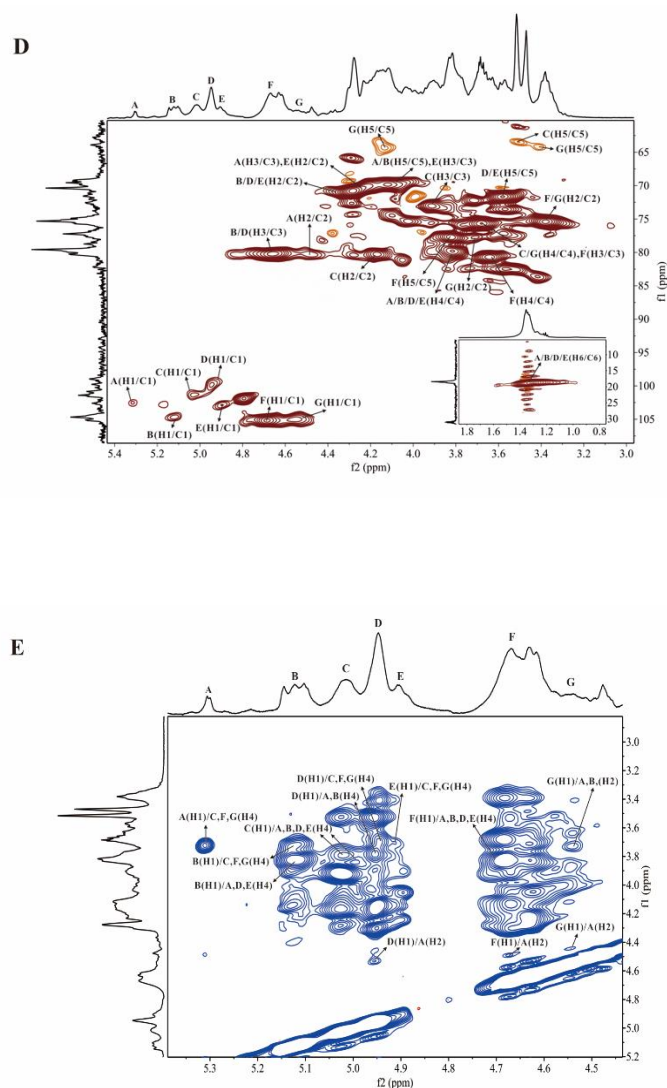

**Figure S1.** NMR spectra of UCP. Spectra were performed on an Agilent DD2 500M NMR spectrometer. Chemical shifts are referenced to internal acetone at 2.225 ppm for  $^1\text{H}$  and 31.07 ppm for  $^{13}\text{C}$ . (A)  $^1\text{H}$  NMR spectrum; (B)  $^{13}\text{C}$  NMR spectrum; (C)  $^1\text{H}$ - $^1\text{H}$  COSY spectrum; (D)  $^1\text{H}$ - $^{13}\text{C}$  HSQC spectrum; and (E)  $^1\text{H}$ - $^1\text{H}$  NOESY spectrum. A-G correspond to  $\rightarrow 2,4$ - $\alpha$ -L-Rhap-(1 $\rightarrow$ ,  $\rightarrow 4$ )- $\alpha$ -L-Rhap(3SO<sub>4</sub>)-(1 $\rightarrow$ ,  $\rightarrow 4$ )- $\beta$ -D-Xylp-(2SO<sub>4</sub>)-(1 $\rightarrow$ ,  $\rightarrow 4$ )- $\beta$ -L-Rhap(3SO<sub>4</sub>)-(1 $\rightarrow$ ,  $\rightarrow 4$ )- $\beta$ -L-Rhap-(1 $\rightarrow$ ,  $\rightarrow 4$ )- $\beta$ -D-GlcAp(1 $\rightarrow$  and  $\rightarrow 4$ )- $\beta$ -D-Xylp-(1 $\rightarrow$ , respectively.
